# Supplementary material
Source: publisher site journal article supplement (https://www.dovepress.com/article/supplementary_file/591447/591447%20-%20supplementary%20Table%20S1-S4.docx)
Supplement: Supplementary file 1 [file 591447%20-%20supplementary%20Table%20S1-S4.docx]

Table S1: Comparison of the advantages, limitations, and clinical translational potential of major nanocarrier platforms used in PDT.

| Nanocarrier Platform | Advantages | Limitations | Clinical Translation Potential | Representative Materials / Formulations |
| --- | --- | --- | --- | --- |
| Liposomes / Lipid Nanoparticles | High biocompatibility, favorable safety profile, facile surface modification, availability of clinically validated delivery systems | Limited drug loading capacity, moderate storage stability | High | Vemurafenib, liposome-encapsulated Ce6 |
| Polymeric Nanoparticles | High drug loading capacity, tunable degradation kinetics, controlled drug release, versatile functionalization | Batch-to-batch variability, relatively slow clearance for some formulations | Medium | PLGA nanoparticles, polymeric micelles |
| AIE Nanomaterials | Enhanced ROS generation, reduced aggregation-caused quenching, integrated imaging and therapeutic capabilities | Complex synthesis, limited clinical validation | Medium - High | Tetraphenylethylene-based AIE photosensitizers |
| Metal-Organic Frameworks (MOFs) | Large specific surface area, high loading capacity, versatile functionalization | Potential metal-related toxicity, incomplete understanding of biodegradation mechanisms | Medium | Zirconium-based MOFs, titanium-based MOFs |
| Upconversion Nanoparticles (UCNPs) | Near-infrared activation, deep tissue penetration, efficient energy conversion | Potential heavy metal toxicity, complex synthesis | Low - Medium | Rare-earth doped upconversion nanoparticles |
| Gold Nanomaterials | Photothermal / photodynamic synergism, favorable optical properties, facile surface modification | Potential long-term accumulation, relatively high manufacturing cost | Medium | Gold nanoparticles, gold nanorods |
| Carbon-Based Nanomaterials | Strong light absorption, high surface area, versatile surface modification | Limited biodegradability, unresolved long-term biosafety concerns | Low | Graphene oxide, carbon dots |

Table S2: Summary of the synergistic mechanisms, therapeutic benefits, and translational status of PDT combined with different therapeutic modalities

| Combination Therapy | Synergistic Mechanism | Principal Therapeutic Benefits | Development Stage | Clinical Translational Status |
| --- | --- | --- | --- | --- |
| PDT + Immunotherapy | Induction of immunogenic cell death, release of damage-associated molecular patterns (DAMPs), enhanced antigen presentation, and potentiation of immune checkpoint blockade | Activation of systemic anti-tumor immunity, induction of abscopal responses, suppression of metastasis and recurrence | Preclinical (2022–2025) | Phase I/II clinical trials ongoing |
| PDT + Chemotherapy | ROS-triggered drug release, reversal of multidrug resistance, complementary cytotoxic mechanisms | Enhanced tumor suppression, reduced systemic toxicity, improved therapeutic efficacy | Advanced preclinical and early clinical investigation | Limited clinical evaluations, few nanoformulations have entered clinical studies |
| PDT + Radiotherapy | Amplification of ROS generation, complementary DNA damage, improvement of tumor oxygenation through nanoplatform-mediated mechanisms | Enhanced radiosensitivity, mitigation of hypoxia-associated resistance, treatment of deep-seated tumors | Preclinical studies | Early clinical exploration |
| PDT + Sonodynamic Therapy | Deep tissue activation, dual ROS generation, complementary energy-mediated cytotoxicity | Improved treatment of deep solid tumors, reduced dependence on light penetration | Preclinical studies | No established clinical studies |
| PDT + Molecular Targeted Therapy | Receptor-mediated targeting, enhanced intratumoral accumulation, reduction of off-target exposure | Improved therapeutic selectivity, enhanced tumor-specific efficacy, reduced toxicity | Preclinical development | Early translational research |

Table S3: Clinical status of approved photosensitizers and development of nano-formulated PDT systems

| Brand Name | Generic Name | Approved Clinical Indications | Nano Enabled Formulation | Nano Formulation Type | Development Status of Nano PDT Systems |
| --- | --- | --- | --- | --- | --- |
| Photofrin | Porfimer sodium | Esophageal cancer, lung cancer, and other approved oncologic indications | No | Conventional small-molecule photosensitizer | Nano formulated systems remain largely preclinical or in early clinical development |
| Visudyne | Verteporfin | Neovascular (wet) age-related macular degeneration | Yes | Liposomal formulation | Approved liposomal formulation; tumor-targeted nano-PDT systems are primarily in Phase I/II clinical evaluation |
| Foscan | Temoporfin | Advanced head and neck squamous cell carcinoma | No | Conventional small-molecule photosensitizer | Liposomal and polymeric nanoformulations are under preclinical and early clinical investigation |
| Levulan | 5-Aminolevulinic acid (ALA) | Actinic keratosis and related dermatologic indications | No | Small-molecule prodrug | Nano carrier-based ALA formulations remain in preclinical or early clinical development |
| Cysview | Hexaminolevulinate | Fluorescence-guided detection of non-muscle-invasive bladder cancer | No | Small-molecule prodrug | No approved nanoformulations; development remains primarily preclinical |
| ALA-based formulations | Aminolevulinic acid | Dermatologic and oncologic PDT applications in selected regions | No | Small-molecule prodrug | Micelle-based, nanoparticle-based, and microneedle-assisted formulations remain in preclinical or early clinical evaluation |
| Fumaderm | Haemoporfin | Port-wine stain treatment | No | Small-molecule photosensitizer | Nano-delivery systems remain at the preclinical research stage |

Table S4: Comparative assessment of PDT technology evolution, clinical translation, combination therapeutic strategies, and mechanistic insights

| Year | Coverage of Technology Types (Conventional vs Emerging) | Depth of Clinical Translation | Comprehensiveness of Combination Therapy Strategies | Depth of Mechanistic Understanding |
| --- | --- | --- | --- | --- |
| Project | Covers conventional PDT and a full spectrum of emerging nano-platforms, including aggregation-induced emission photosensitizers, NIR-II, biomimetic coatings, metal-organic frameworks, upconversion nanoparticles, X-ray activated PDT, Cerenkov PDT, two-photon, self-luminescent systems | Systematically summarizes approved photosensitizers and provides detailed analysis of clinical trials, regulatory barriers, GMP production, scale-up challenges, biosafety, and toxicity considerations | Comprehensive coverage of PDT combined with chemotherapy, radiotherapy, and immunotherapy, including in-depth analysis of synergistic mechanisms such as immunogenic cell death and the abscopal effect, supported by quantitative evidence | Detailed discussion of Type I and Type II mechanisms, hypoxia tolerance, ROS diffusion, subcellular targeting, nanomaterial-mediated conversion toward Type I pathways |
| 2021 | Primarily focuses on conventional PDT and basic nanocarriers, with very limited discussion of emerging platforms | Briefly mentions clinical potential without addressing clinical trials or regulatory considerations | Lists combination strategies without mechanistic analysis | Provides a basic description of Type II mechanisms without addressing hypoxia-related processes |
| 2022 | Covers a conventional PDT and a limited range of emerging nanomaterials | Mentions clinical applications but lacks analysis of translational barriers | Provides a general overview of combination therapies without comparative evaluation | Briefly introduces ROS generation mechanisms without in-depth mechanistic discussion |
| 2023 | Focuses mainly on conventional nano-PDT, with minimal coverage of NIR-II and X-ray-activated PDT | Briefly discussed clinical trials but does not address regulatory issues or toxicity evaluation | Covers select combination strategies with limited discussion of synergy with immunotherapy | Discusses Type I and Type II mechanisms but does not relate them to hypoxia adaptation or nanomaterial-mediated regulation |
| 2024 | Emphasizes conventional nanocarriers, with very limited coverage of advanced functional nanoplatforms | Does not provide a summary of clinical trials, regulatory pathways, or scale-up analysis | Descriptive overview of combination therapies without quantitative or assessment mechanistic support | Presents a basic mechanistic overview without integrating the influence of the in vivo tumor microenvironment |
| 2025 | Includes some emerging nanomaterials, although the classification framework remains incomplete | Mentions clinical challenges but lacks a systematic analysis of translational pathways | Covers a limited range of combination therapies without establishing a comprehensive framework | Describes mechanisms in general terms without focusing on hypoxia tolerance, ROS dynamics, or subcellular targeting |
